# Supplementary material
Source: Research Square preprint supplement (doi:10.21203/rs.3.rs-9346131/v1)
Supplement: Supplementary file 1 [file 02d6eba1f6b4f618a4889c95.docx]

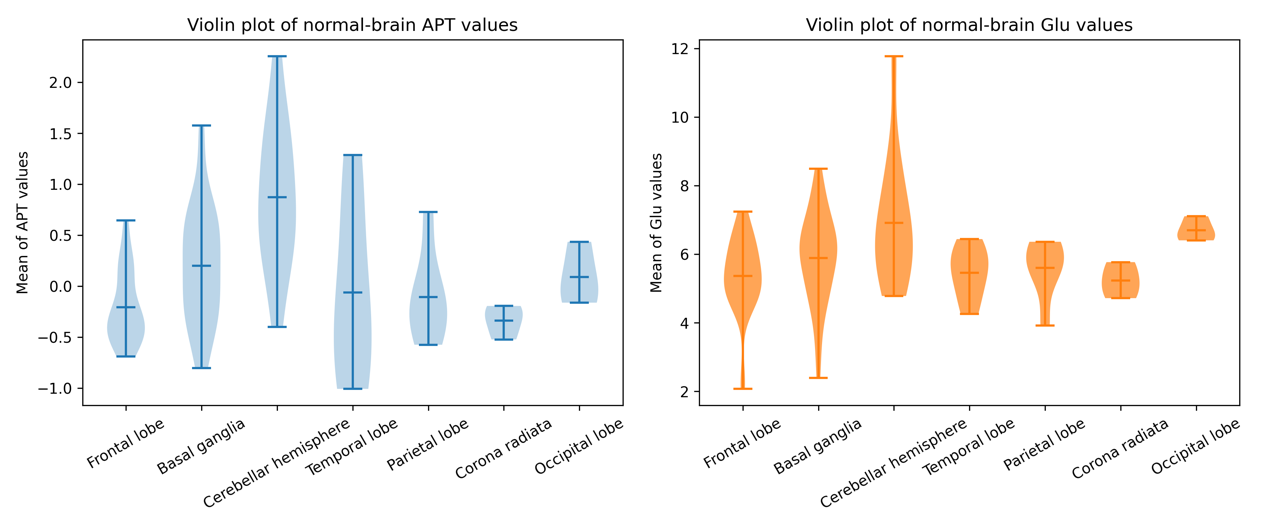


Supplementary Figure 1: Violin plots of APT and Glu measurement in normal brain tissues across various anatomical regions (The three black short horizontal lines represent the mean, minimum, and maximum values).


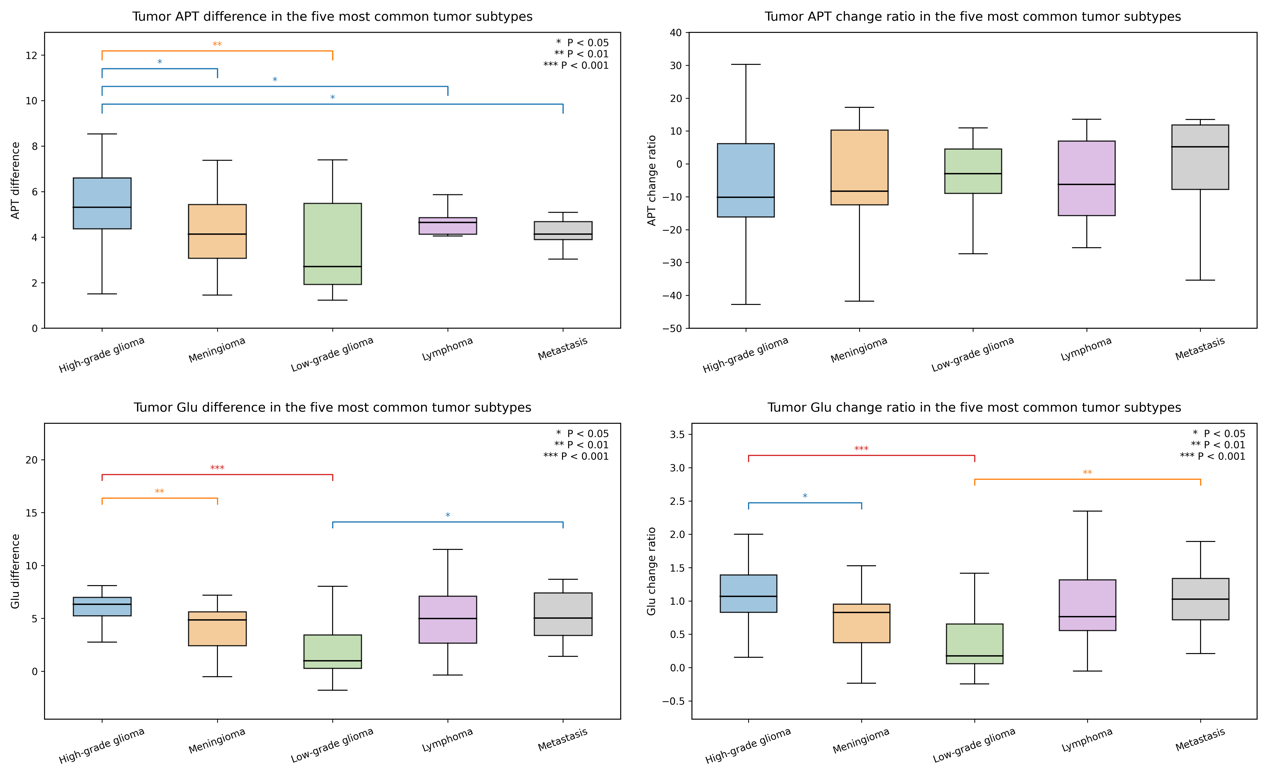


Supplementary Figure 2: Uncorrected box plots of APT/Glu differences and change ratios across five tumor subtypes.

Supplementary Table 1: Mean APT and Glu values in different normal tissue regions

| **Brain region** | **n** | **APT (mean ± SD)** | **Glu (mean ± SD)** |
| --- | --- | --- | --- |
| Frontal lobe | 32 | −0.21 ± 0.36 | 5.37 ± 1.13 |
| Basal ganglia | 31 | 0.20 ± 0.57 | 5.89 ± 1.35 |
| Cerebellar hemisphere | 13 | 0.87 ± 0.72 | 6.91 ± 1.88 |
| Parietal lobe | 6 | −0.11 ± 0.46 | 5.60 ± 0.89 |
| Temporal lobe | 6 | −0.06 ± 0.89 | 5.46 ± 0.79 |
| Corona radiata | 3 | −0.34 ± 0.17 | 5.23 ± 0.53 |
| Occipital lobe | 3 | 0.09 ± 0.31 | 6.70 ± 0.36 |
| Pons | 2 | 0.49 ± 0.45 | 7.00 ± 0.24 |
| All brain | 96 | 0.10 ± 0.62 | 5.83 ± 1.36 |
